# Supplementary material for: Triggering factors associated with a new episode of recurrent acute anterior uveitis
Source: PubMed Central journal article supplement (PMC8190149; doi:10.1038/s41598-021-91701-6), 2021-06-09
Supplement: 41598_2021_91701_MOESM1_ESM.pdf [file 41598_2021_91701_MOESM1_ESM.pdf]

# **Triggering factors associated with a new episode of recurrent acute anterior uveitis**

**Nutnicha Neti<sup>1</sup>, Anchisa Pimsri<sup>1</sup>, Sutasinee Boonsopon<sup>1</sup>, Nattaporn Tesavibul<sup>1</sup>, Pitipol Choopong<sup>1,\*</sup>**

|                              | <b>0</b>                                                                                  | <b>1</b>                                  | <b>2</b>                                | <b>3</b>                               |
|------------------------------|-------------------------------------------------------------------------------------------|-------------------------------------------|-----------------------------------------|----------------------------------------|
| <b>Srithanya Stress Test</b> | <b>Hardly ever<br/>or Never<br/>(less than 1<br/>time/week)</b>                           | <b>Sometimes<br/>(1-2<br/>times/week)</b> | <b>Usually<br/>(3-4<br/>times/week)</b> | <b>Always<br/>(5-7<br/>times/week)</b> |
| 1                            | How often do you have sleep problems either sleep difficulty or overslept?                |                                           |                                         |                                        |
| 2                            | How often have you felt that you were unable to concentrate with everyday task?           |                                           |                                         |                                        |
| 3                            | How often have you felt nervous or irritated?                                             |                                           |                                         |                                        |
| 4                            | How often have you felt bored or lack of motivation?                                      |                                           |                                         |                                        |
| 5                            | How often have you felt that you had poor social relation or did not want to meet anyone? |                                           |                                         |                                        |

---

\*This version of ST-5 is only translated for publication.

**Supplement 1.** Srithanya Stress Test (ST-5) in English-translated version\*.
